# Supplementary material
Source: PubMed Central journal article supplement (PMC2861474)
Supplement: tpc.109.066340_1.pdf [file tpc.109.066340_1.pdf]

## Supplemental Figure 1

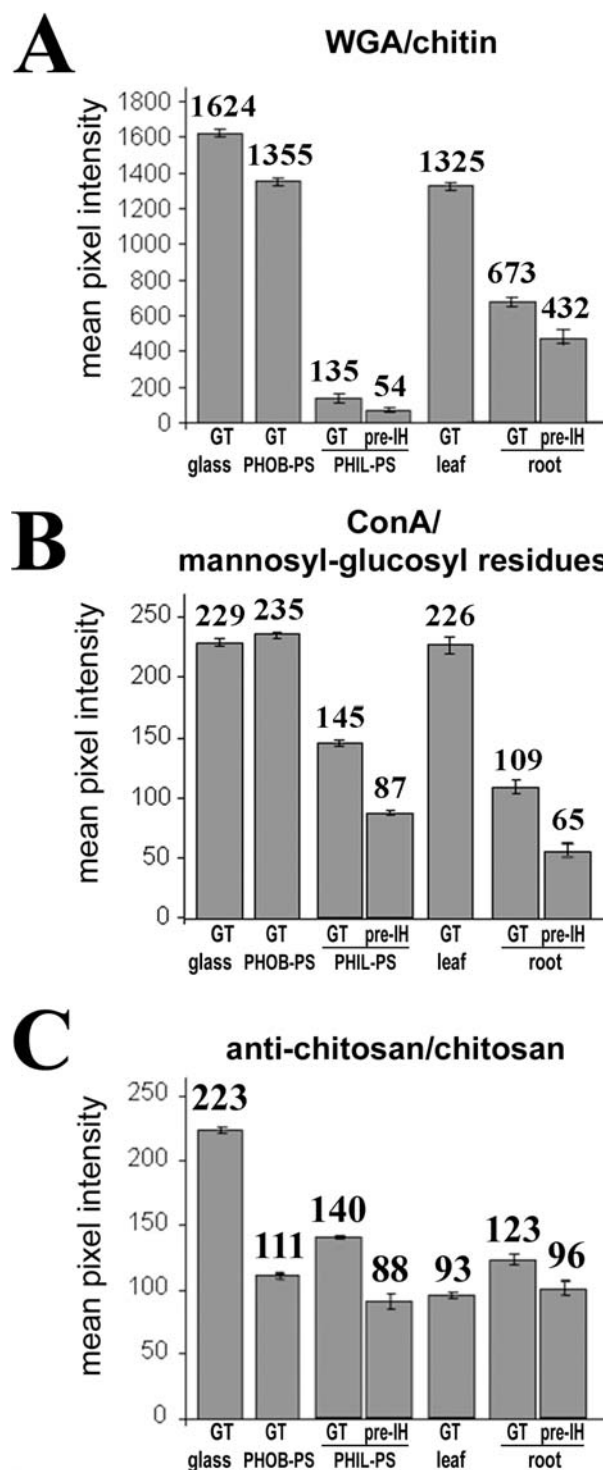

**Supplemental Figure 1. Relative fluorescence quantification of carbohydrates and glycoproteins in *M. oryzae* cell wall.** Pixel intensity measurements taken from *M. oryzae* germinating conidia at 24 h using (A) TRTC-labelled wheat germ agglutinin (WGA, anti-chitin lectin); (B) Alexa594-ConA (ConA, anti-mannosyl and anti-glucosyl lectin), or (C) anti-chitosan antibodies. Standard errors calculated from three independent experiments. GT: germ tube; pre-IH: pre-invasive hyphae.

## Supplemental Figure 2

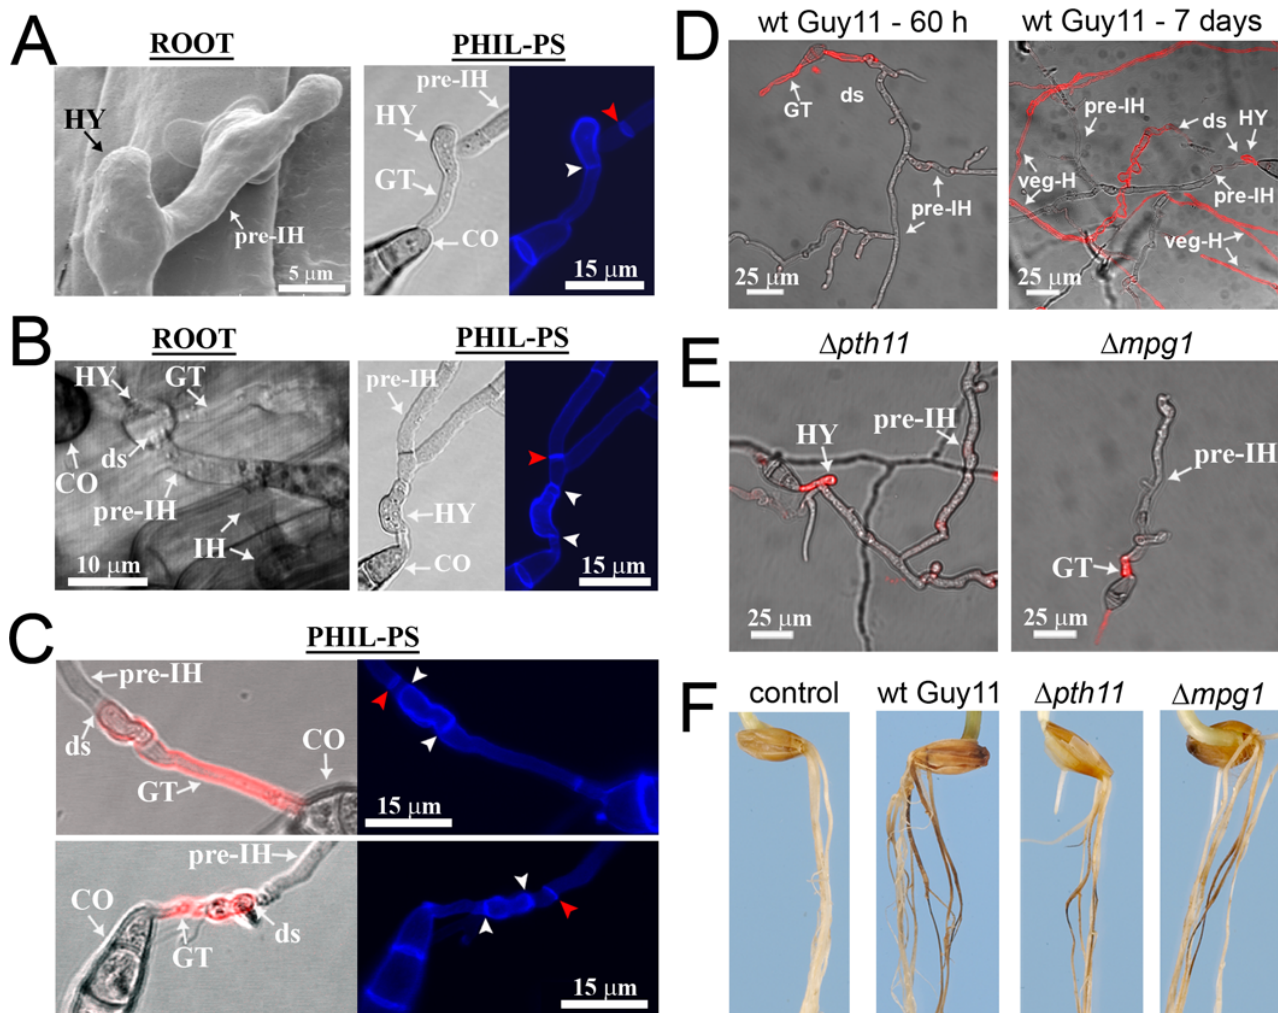

**Supplemental Figure 2. Infection-related development of the wild-type *Guy11*,  $\Delta pth11$  and  $\Delta mpg1$  mutant strains.** (A, B, C) *M. oryzae* *Guy11* germinating conidia on roots or on PHIL-PS at 24 h. Germinating conidia (CO) on PHIL-PS were treated with calcofluor white (shown in blue) and TRTC-WGA (shown in red) to visualise fungal cell walls and septa. Calcofluor fluorescence of hyphopodia (HY) cell walls is stronger compared to germ tubes (GT) or pre-IH cell walls, suggesting differences in cell wall composition. (A) Pre-IH develops from the bottom of the hyphopodium. On PHIL-PS, the pre-IH forms a septum (red arrowhead) near the hyphopodium. A septum (white arrowhead) at the base of the hyphopodium separates this structure from the germ tube. (B) Pre-IH growth is initiated from a side of the hyphopodium. On PHIL-PS, a septum at the beginning and the end of the hyphopodium separates this structure from germ tubes and pre-IH (white arrowheads). Black and white image (left panel) appears in colour in Figure 2A (root). (C) Pre-IH growth initiates from germ tubes developing pre-hyphopodia at their apex. The developmental switch (ds; changes in TRTC-WGA shown in red) occurs in the subcompartment seen at the tip of the germ tube; the strong calcofluor fluorescence suggests that this subcompartment could be a pre-hyphopodium. (D) *M. oryzae* *Guy11* germinating conidium on PHIL-PS treated with TRTC-WGA after sixty hours or seven days. The red colour indicates fluorescent-labelled WGA (chitin) on the cell wall of germ tubes. Pre-IH cell wall fluorescence remained unaffected after seven days. Vegetative hyphae (veg-H) not in direct contact with the PHIL-PS surface showed strong TRTC-WGA labelling at seven days. (E) Germ tubes (GT) of the  $\Delta pth11$  and  $\Delta mpg1$  mutants showing the switch to formation of pre-invasive hyphae (pre-IH) on PHIL-PS. (F) Root-infection tests of *M. oryzae* wild type and mutants  $\Delta pth11$  and  $\Delta mpg1$ .

## Supplemental Figure 3

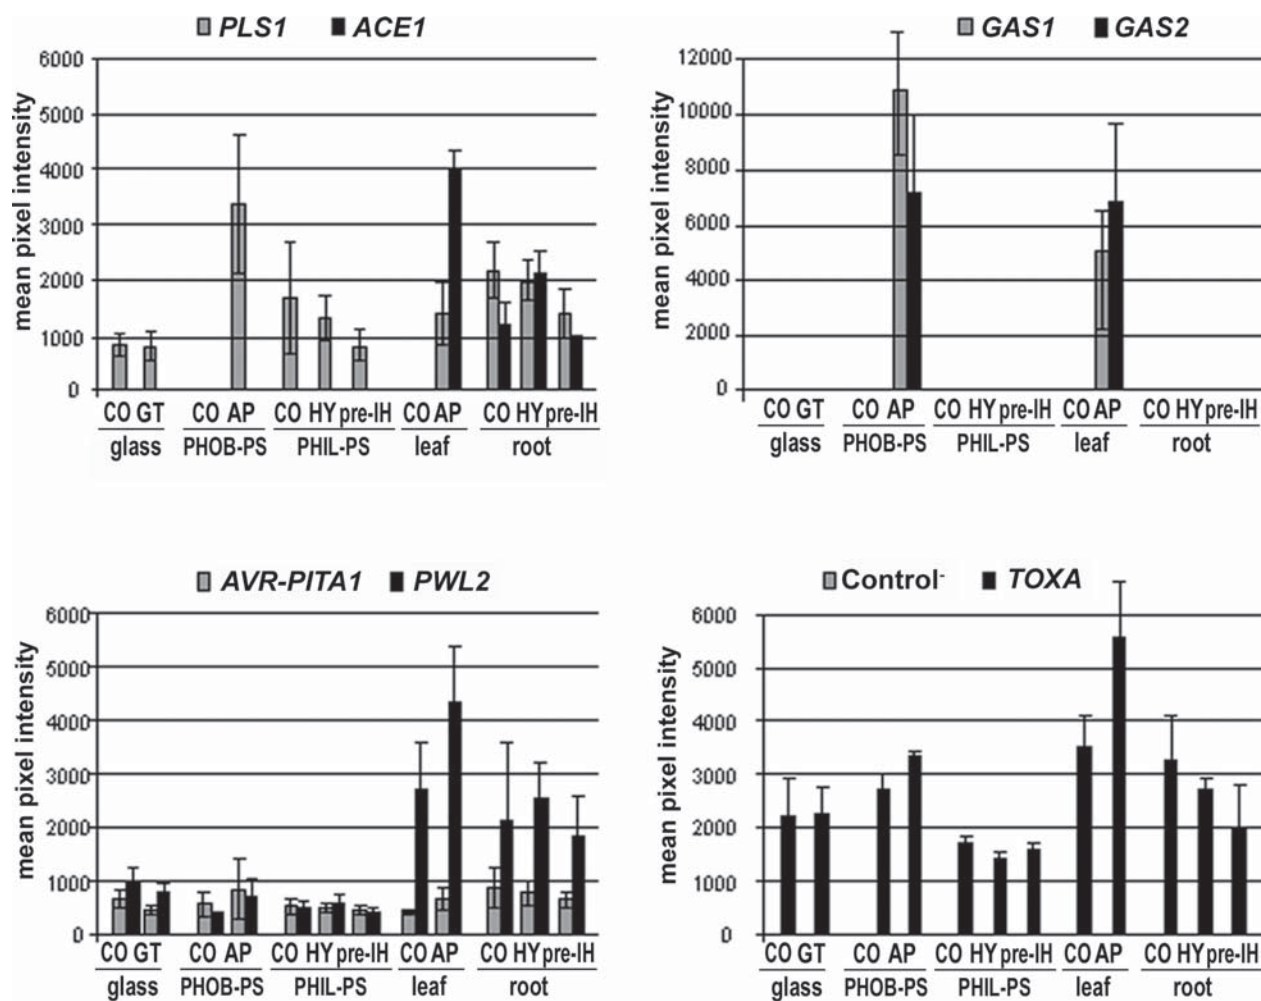

**Supplemental Figure 3. Gene-expression analysis of pathogenesis-related genes.** Pixel intensity measurements of GFP promoter fusion constructs on germinated conidia at 24 h. Measurements were performed on specific fungal structures. Different scales were used across plots. Standard errors calculated from three independent experiments. CO: conidium; AP: appressorium; HY: hyphopodium; pre-IH: pre-invasive hyphae.

**Supplemental Figure 4.** Phenotypes and T-DNA-tagged locations of mutants with altered growth on PHIL-PS.

- <sup>a</sup>Green arrows indicate T-DNA insertion
- <sup>b</sup>Colony morphology on complete medium (CM)
- <sup>c</sup>Morphology of germ tubes and appressoria on PHOB-PS
- <sup>d</sup>Morphology of germ tubes and pre-invasive hyphae on PHIL-PS
- <sup>e</sup>Infected rice leaves (whole plant infection assays)
- <sup>f</sup>Infected barley leaves (detached infection assays - intact leaves)
- <sup>g</sup>Infected barley leaves (detached infection assays - wounded leaves/ cuticle was abraded with carborundum powder)
- <sup>h</sup>Infected rice roots

| Mutant number/<br>Location of T-DNA insertion <sup>a</sup>                                             | CM <sup>b</sup>                                                                     | PHOB-PS <sup>c</sup>                                                                | PHIL-PS <sup>d</sup>                                                                 | rice <sup>e</sup>                                                                    | barley <sup>f</sup>                                                                   | wounded<br>barley <sup>g</sup>                                                        | rice<br>roots <sup>h</sup>                                                            |
|--------------------------------------------------------------------------------------------------------|-------------------------------------------------------------------------------------|-------------------------------------------------------------------------------------|--------------------------------------------------------------------------------------|--------------------------------------------------------------------------------------|---------------------------------------------------------------------------------------|---------------------------------------------------------------------------------------|---------------------------------------------------------------------------------------|
| <b>Wild-type Guy11</b><br><br>Intact genome without T-DNA insertion                                    |   |   |   |  |   |   |   |
| <b>M73a</b><br><br> |  |  |  | No conidia                                                                           |  |  |  |
| <b>M73b</b><br><br> |                                                                                     |                                                                                     |                                                                                      |                                                                                      |                                                                                       |                                                                                       |                                                                                       |

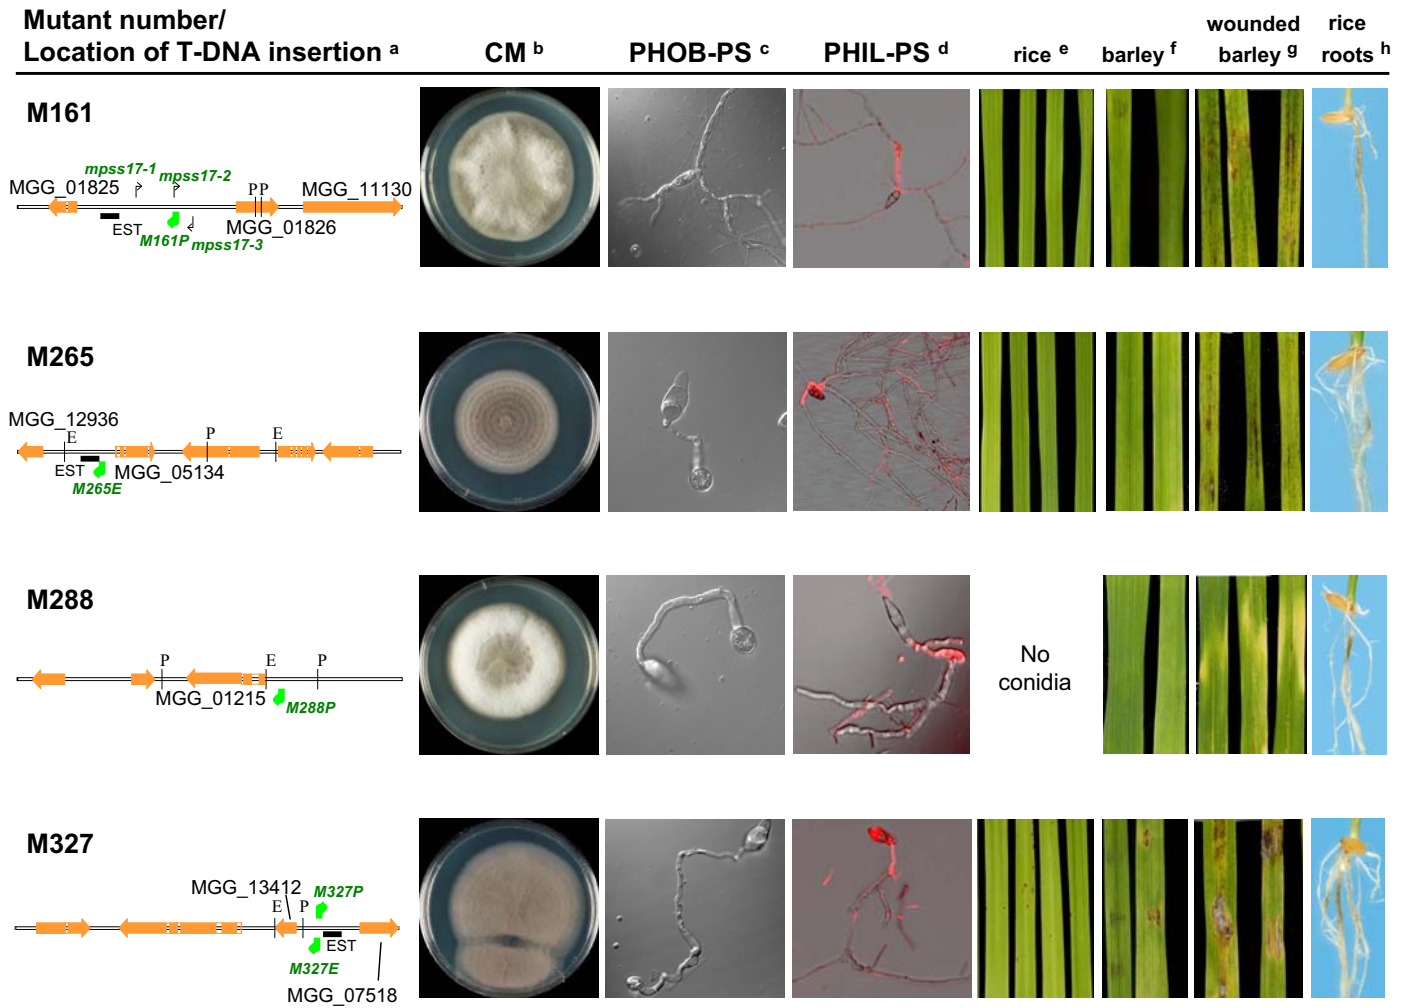

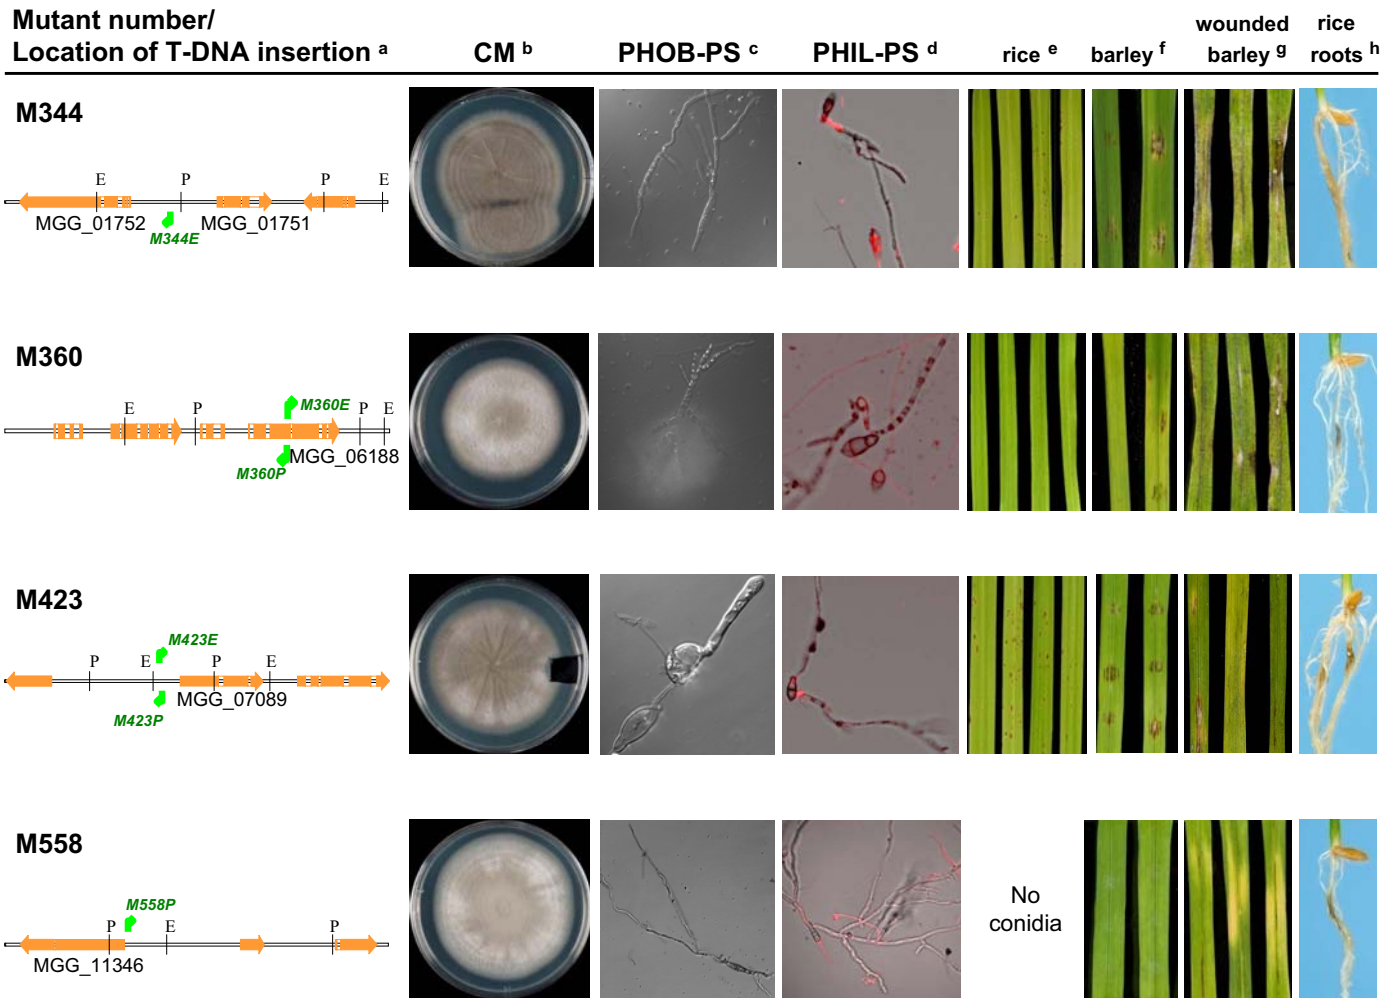

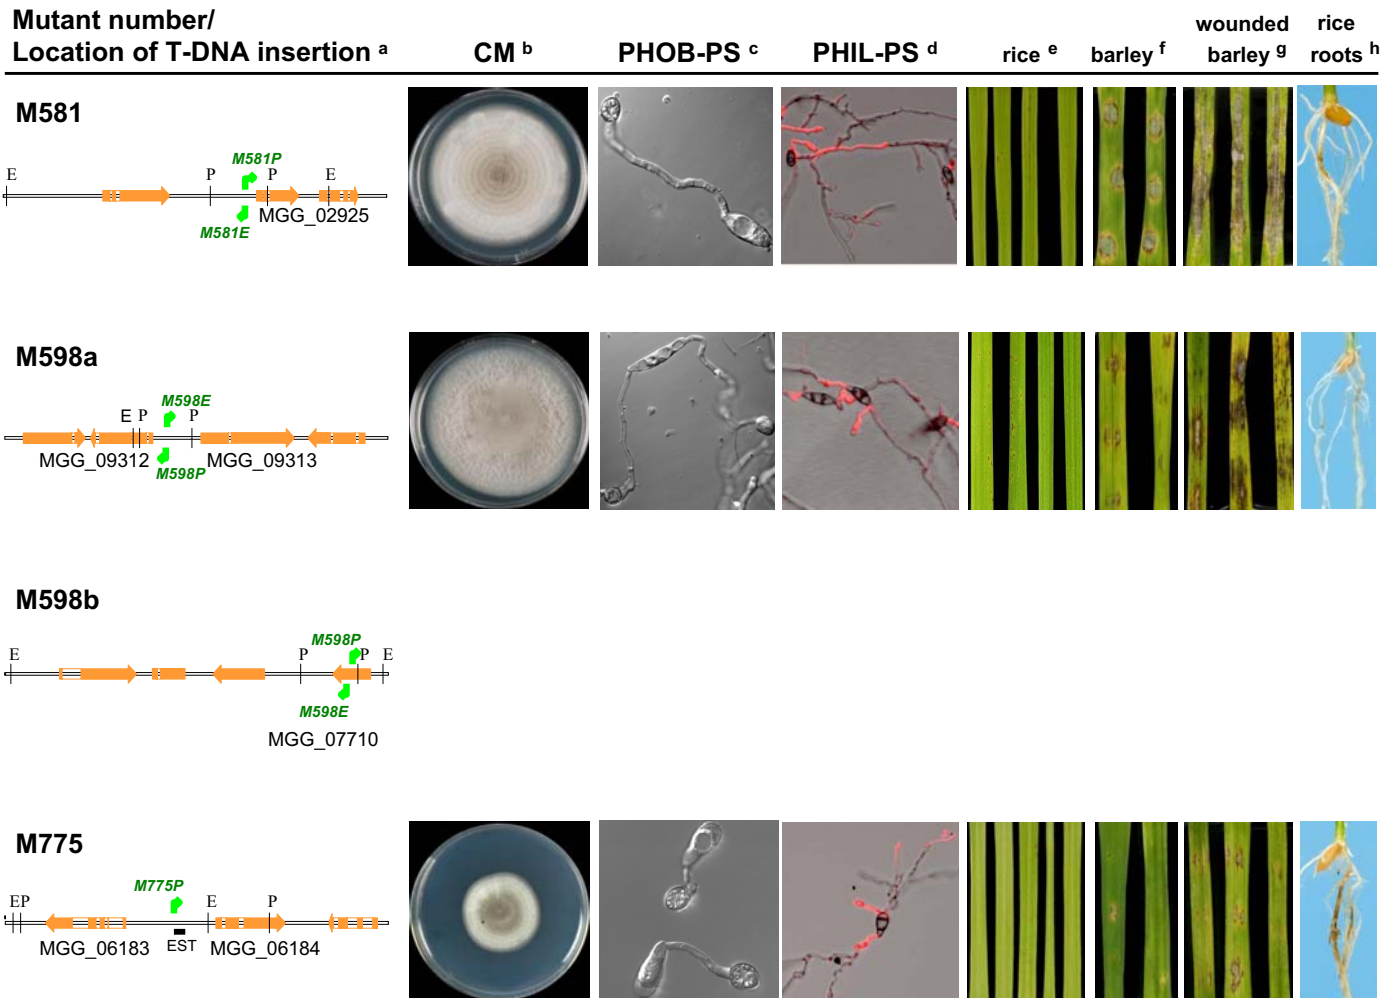

| Mutant number/<br>Location of T-DNA insertion <sup>a</sup>                                         | CM <sup>b</sup>                                                                     | PHOB-PS <sup>c</sup>                                                                | PHIL-PS <sup>d</sup>                                                                 | rice <sup>e</sup>                                                                     | barley <sup>f</sup>                                                                   | wounded<br>barley <sup>g</sup>                                                        | rice<br>roots <sup>h</sup>                                                            |
|----------------------------------------------------------------------------------------------------|-------------------------------------------------------------------------------------|-------------------------------------------------------------------------------------|--------------------------------------------------------------------------------------|---------------------------------------------------------------------------------------|---------------------------------------------------------------------------------------|---------------------------------------------------------------------------------------|---------------------------------------------------------------------------------------|
| <b>M984a</b><br>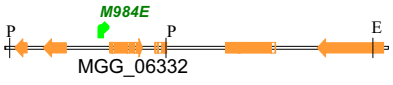  |    |    |    |    |    |    |    |
| <b>M984b</b><br> |                                                                                     |                                                                                     |                                                                                      |                                                                                       |                                                                                       |                                                                                       |                                                                                       |
| <b>M997</b><br> |  |  |  |  |  |  |  |
| <b>M1085</b><br>Retrotransposon-like                                                               |  |  |  | No<br>conidia                                                                         |  |  |  |



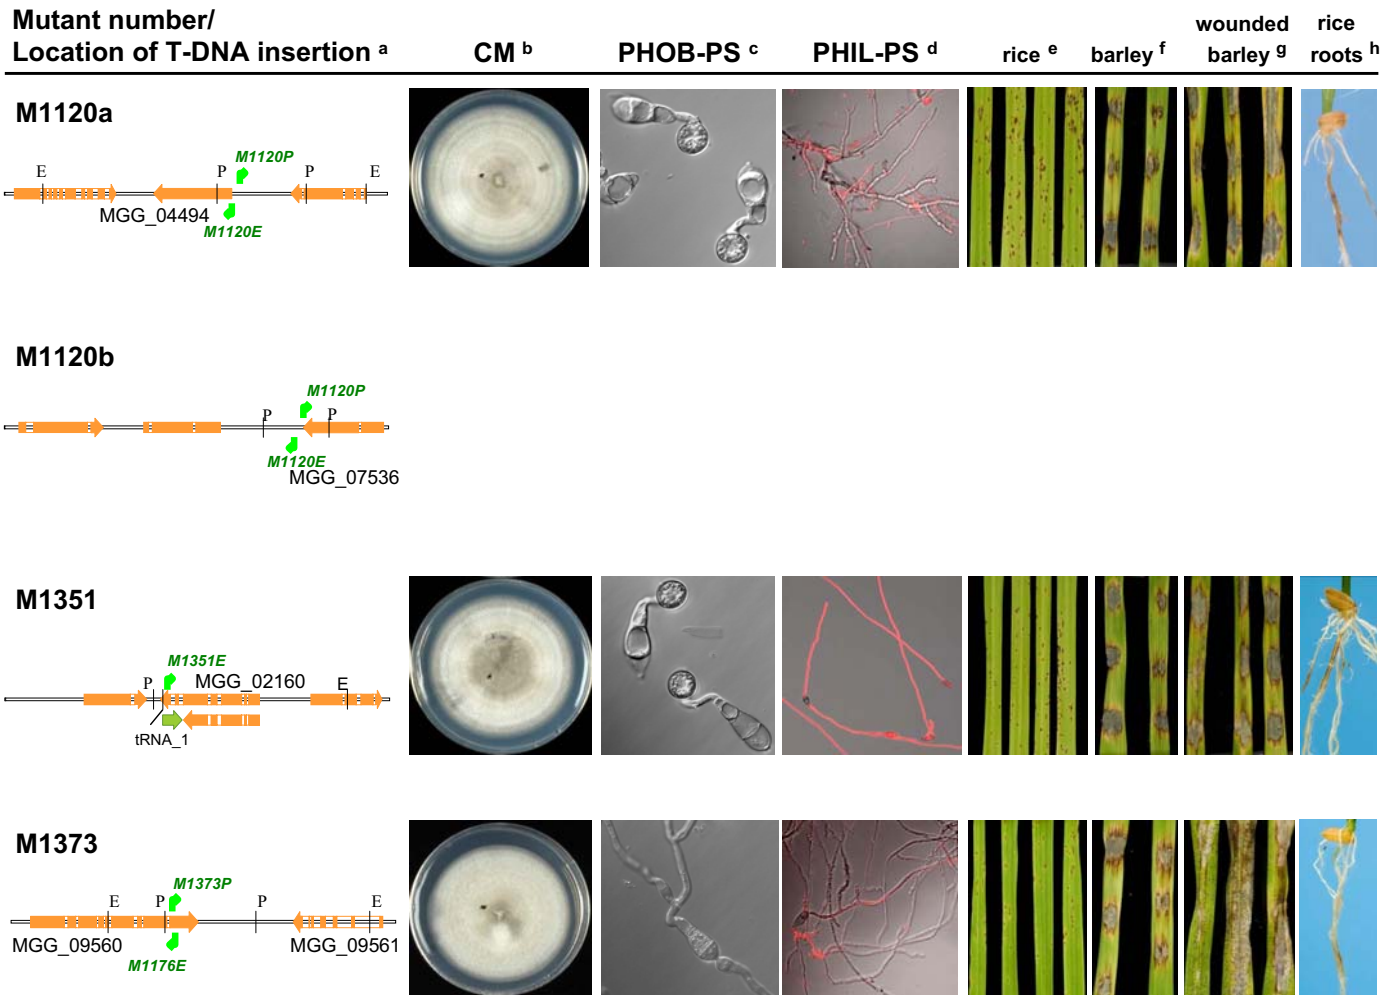

| Mutant number/<br>Location of T-DNA insertion <sup>a</sup>                                          | CM <sup>b</sup>                                                                     | PHOB-PS <sup>c</sup>                                                                | PHIL-PS <sup>d</sup>                                                                 | rice <sup>e</sup>                                                                     | barley <sup>f</sup>                                                                   | wounded<br>barley <sup>g</sup>                                                        | rice<br>roots <sup>h</sup>                                                            |
|-----------------------------------------------------------------------------------------------------|-------------------------------------------------------------------------------------|-------------------------------------------------------------------------------------|--------------------------------------------------------------------------------------|---------------------------------------------------------------------------------------|---------------------------------------------------------------------------------------|---------------------------------------------------------------------------------------|---------------------------------------------------------------------------------------|
| <b>M1472</b><br>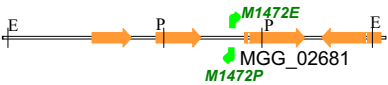   |    |    |    |    |    |    |    |
| <b>M1623</b><br>  |   |   |   |   |   |   |   |
| <b>M1732</b><br> |  |  |  |  |  |  |  |
| <b>M1854</b><br> |  |  |  | No conidia                                                                            |  |  |  |

| Mutant number/<br>Location of T-DNA insertion <sup>a</sup>                                          | CM <sup>b</sup>                                                                     | PHOB-PS <sup>c</sup>                                                                | PHIL-PS <sup>d</sup>                                                                 | rice <sup>e</sup> | barley <sup>f</sup>                                                                   | wounded<br>barley <sup>g</sup>                                                        | rice<br>roots <sup>h</sup>                                                            |
|-----------------------------------------------------------------------------------------------------|-------------------------------------------------------------------------------------|-------------------------------------------------------------------------------------|--------------------------------------------------------------------------------------|-------------------|---------------------------------------------------------------------------------------|---------------------------------------------------------------------------------------|---------------------------------------------------------------------------------------|
| <b>M1876</b><br>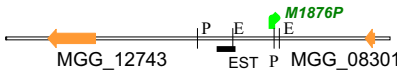   |    |    |    | No conidia        |    |    |    |
| <b>M1981</b><br>  |   |   |   | No conidia        |   |   |   |
| <b>M2002</b><br> |  |  |  | No conidia        |  |  |  |
| <b>M2102</b><br> |  |  |  | No conidia        |  |  |  |

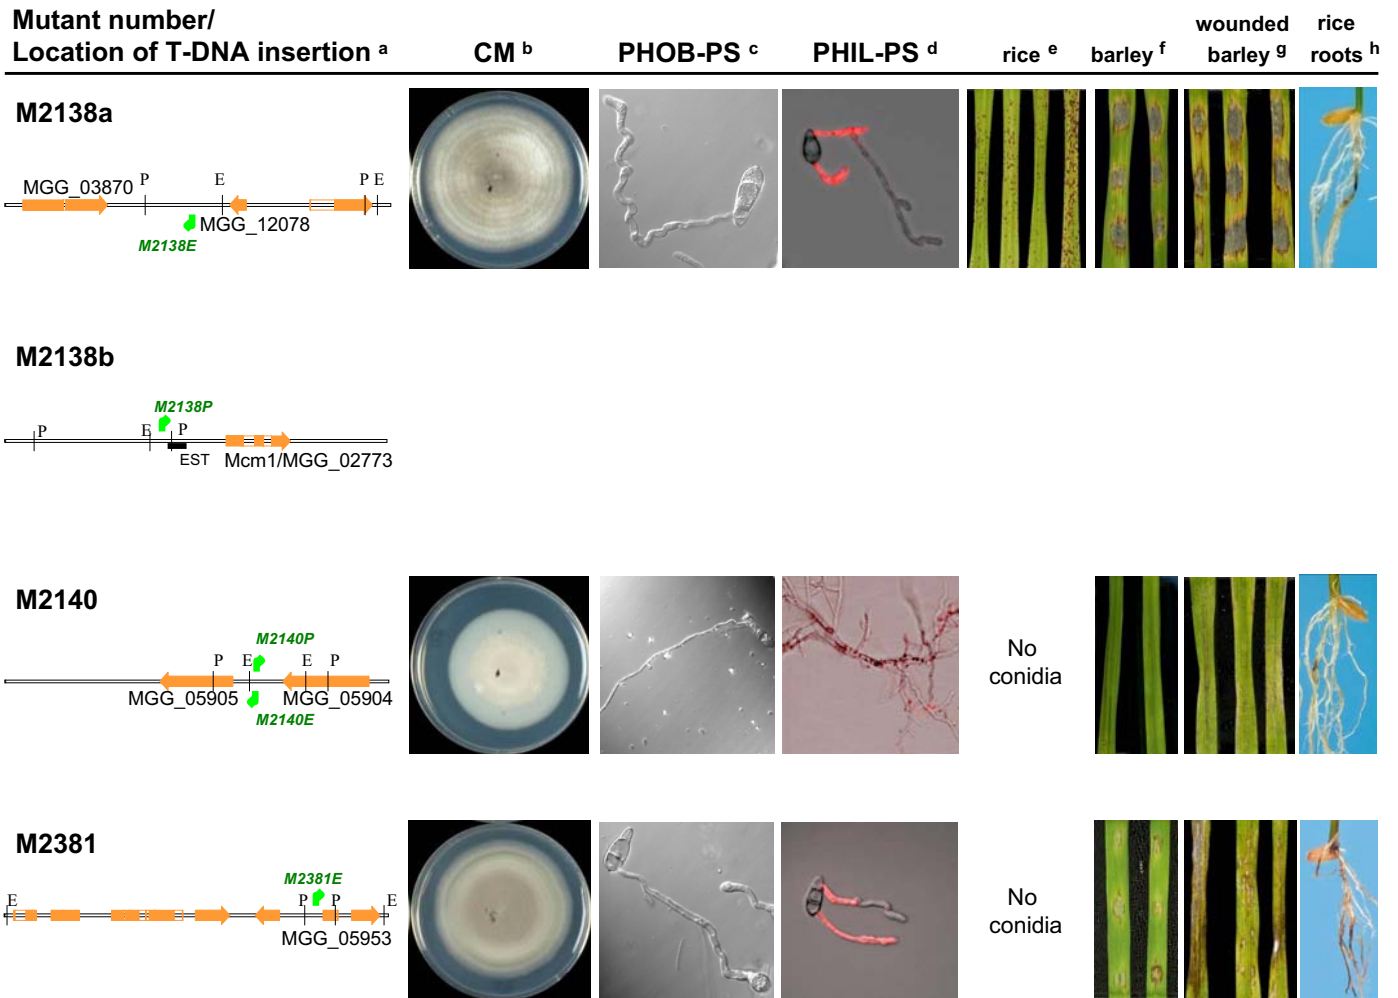

| Mutant number/<br>Location of T-DNA insertion <sup>a</sup>                                                        | CM <sup>b</sup>                                                                     | PHOB-PS <sup>c</sup>                                                                | PHIL-PS <sup>d</sup>                                                                 | rice <sup>e</sup>                                                                     | barley <sup>f</sup>                                                                   | wounded<br>barley <sup>g</sup>                                                        | rice<br>roots <sup>h</sup>                                                            |
|-------------------------------------------------------------------------------------------------------------------|-------------------------------------------------------------------------------------|-------------------------------------------------------------------------------------|--------------------------------------------------------------------------------------|---------------------------------------------------------------------------------------|---------------------------------------------------------------------------------------|---------------------------------------------------------------------------------------|---------------------------------------------------------------------------------------|
| <b>M2495</b><br>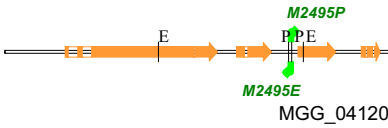<br>MGG_04120    |    |    |    | No conidia                                                                            |    |    |    |
| <b>M2503a</b><br><br>MGG_10087  |   |   |   |   |   |   |   |
| <b>M2503b</b><br><br>MGG_04032 |                                                                                     |                                                                                     |                                                                                      |                                                                                       |                                                                                       |                                                                                       |                                                                                       |
| <b>M2524</b><br><br>MGG_12276  |  |  |  |  |  |  |  |

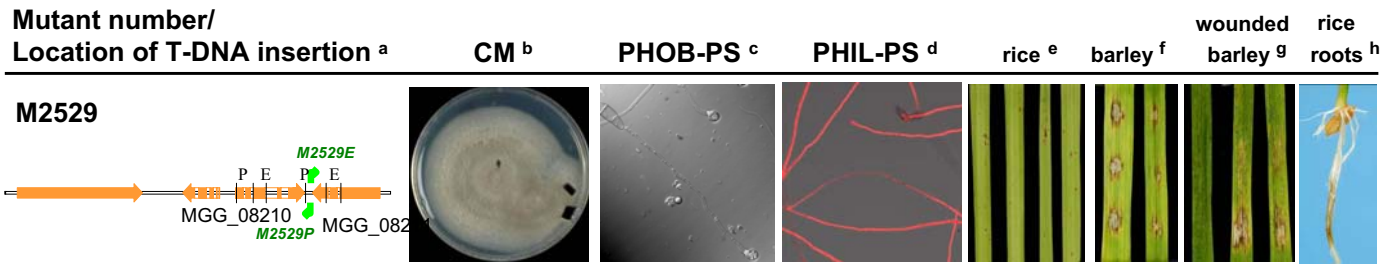

## Supplemental Figure 5

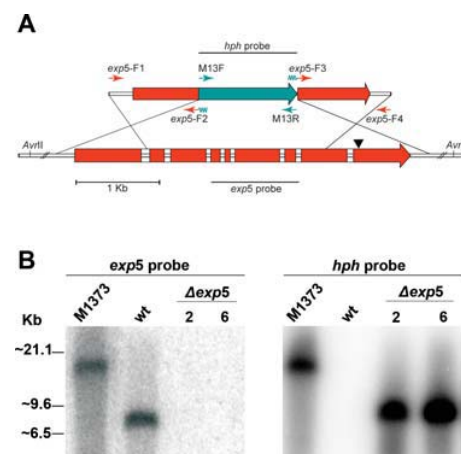

**Supplemental Figure 5. Replacement of the *M. oryzae* EXP5 gene.** (A) Schematic diagram showing the targeted gene deletion strategy. (B) Southern Blot analysis of wild type (wt) Guy11 and two independent  $\Delta$ exp5 mutant strains. The 6,265 bp band is visible in *AvrII*-digested wt DNA using the *EXP5* gene as a probe (region deleted in the  $\Delta$ exp5 mutants). A single band of the expected size is visible in both deletion strains using the 1.6 Kb hygromycin phosphotransferase gene (*hph*) as a probe.

## Supplemental Figure 6

## A. Leaf infection assays

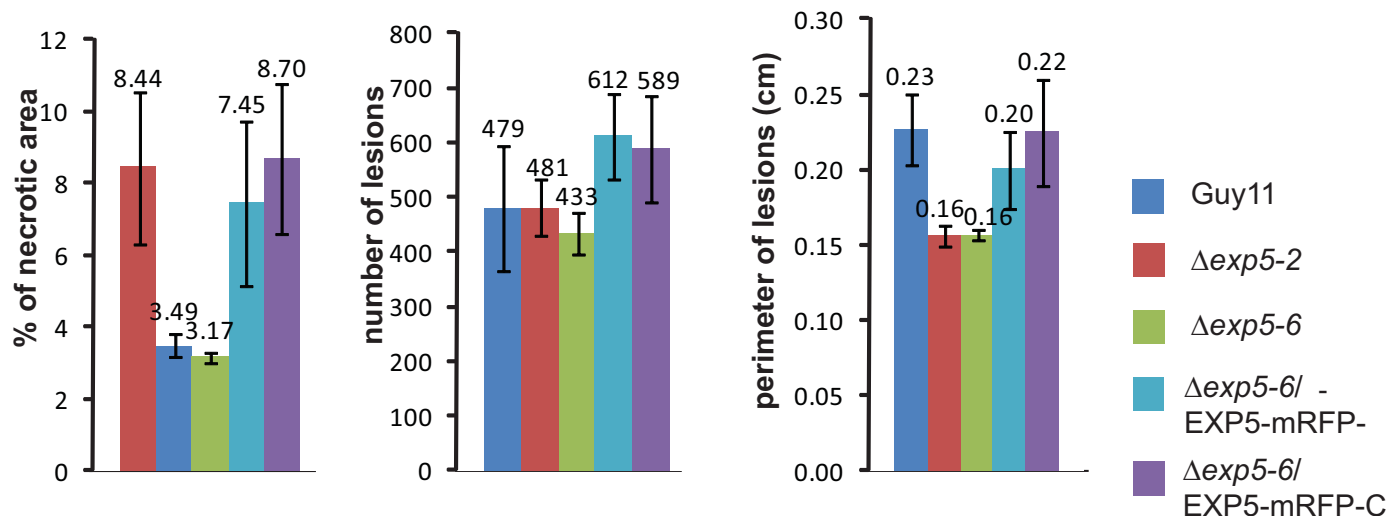

## B. Root infection assays

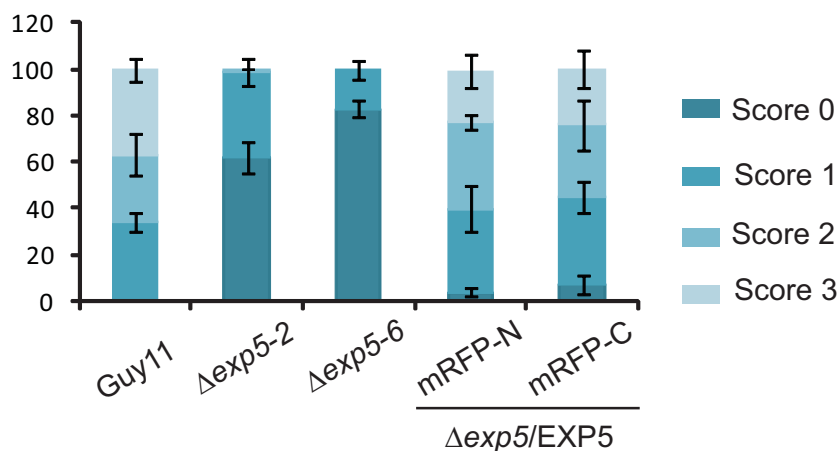

| PS-PHIL                     | scored roots/total roots examined (3 experiments) |        |        |        | mean percentage $\pm$ SE |             |             |            |
|-----------------------------|---------------------------------------------------|--------|--------|--------|--------------------------|-------------|-------------|------------|
|                             | 0                                                 | 1      | 2      | 3      | 0                        | 1           | 2           | 3          |
| Guy11                       | 0/100                                             | 34/100 | 29/100 | 37/100 | 0                        | 34 $\pm$ 4  | 29 $\pm$ 9  | 37 $\pm$ 5 |
| $\Delta exp5-2$             | 52/85                                             | 32/85  | 1/85   | 0/85   | 62 $\pm$ 7               | 37 $\pm$ 6  | 1           | 0          |
| $\Delta exp5-6$             | 77/92                                             | 15/92  | 0/92   | 0/92   | 83 $\pm$ 4               | 17 $\pm$ 4  | 0           | 0          |
| $\Delta exp5-6/EXP5-mRFP-N$ | 4/94                                              | 34/94  | 35/94  | 21/94  | 4 $\pm$ 2                | 36 $\pm$ 10 | 37 $\pm$ 3  | 22 $\pm$ 7 |
| $\Delta exp5-6/EXP5-mRFP-C$ | 7/95                                              | 36/95  | 30/95  | 22/95  | 7 $\pm$ 4                | 38 $\pm$ 7  | 31 $\pm$ 11 | 24 $\pm$ 8 |

**Supplemental Figure 6. Quantification of disease symptoms produced by *M. oryzae* wild type strain Guy11,  $\Delta exp5-2$  and  $\Delta exp5-6$  mutants, and  $\Delta exp5-6$  complemented with EXP5-mRFP-N and EXP5-mRFP-C protein fusions.** (A) Whole plant infection assays. Three pots of 10 plants were used per strain and per experiment; standard errors were calculated from three independent experiments. Pictures of all infected leaves were analysed using the image analysis software for disease quantification Assess 2.0 (The American Phytothological Society). (B) Scoring of disease symptoms on roots. The table shows total numbers and mean percentages of infected roots with different lesion severity (scoring system: 0 - no symptoms; 1 - strong reduction; 2 - weak reduction; 3 - wild type symptoms). Values used in the chart represent the mean percentage of three experiments (error bars represent standard errors).



## Supplemental Figure 7

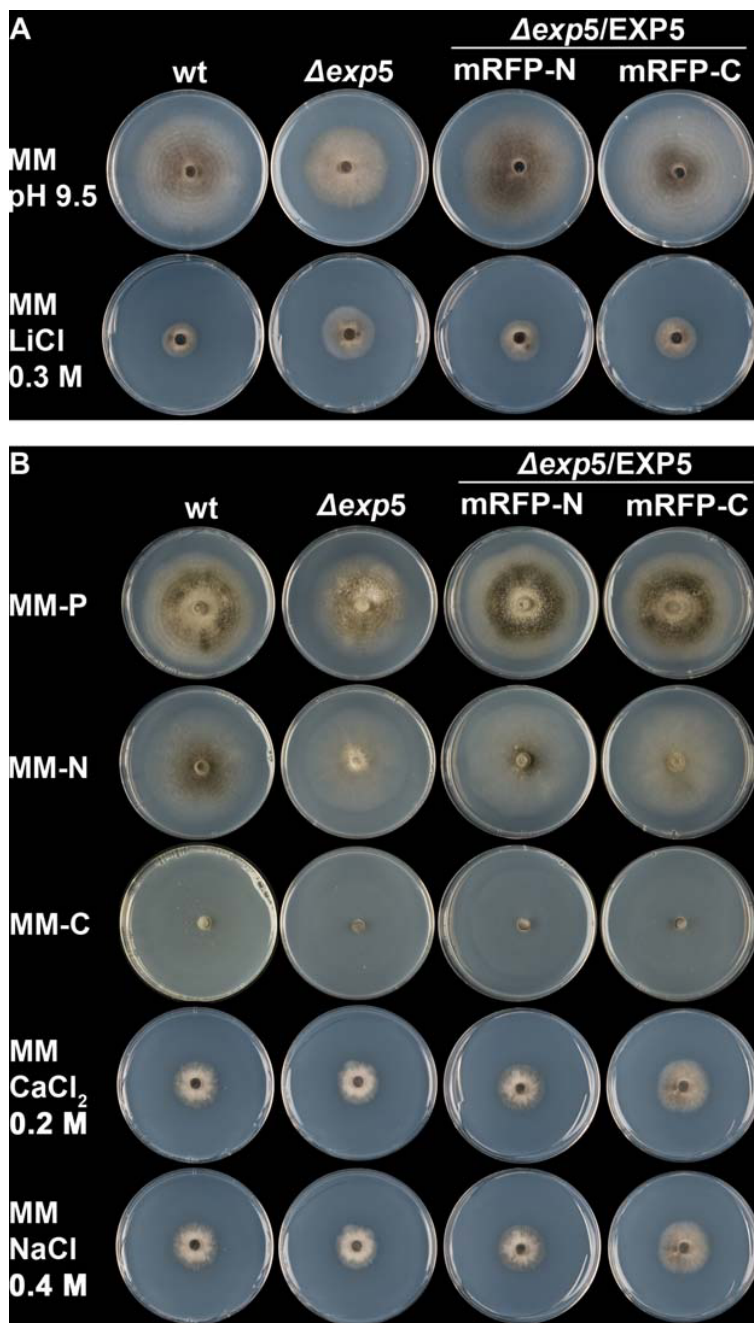

**Supplemental Figure 7. Colony morphology of the wild type,  $\Delta exp5$  and  $\Delta exp5/EXP5$ -mRFP strains on various stress-related conditions.** Cultures were incubated for 10 days at 25°C with a 16 h photoperiod. **(A)** Wild type,  $\Delta exp5$ ,  $\Delta exp5/EXP5$ -mRFP-N, and  $\Delta exp5/EXP5$ -mRFP-C strains on Minimal Medium (MM) with pH adjusted to 9.5 using NaOH or supplemented with LiCl 0.3 M. **(B)** The same strains on MM without phosphate (MM-P), nitrogen (MM-N) and carbon (MM-C), or MM supplemented with CaCl<sub>2</sub> 0.2 M and NaCl 0.4 M.

## Supplemental Figure 8

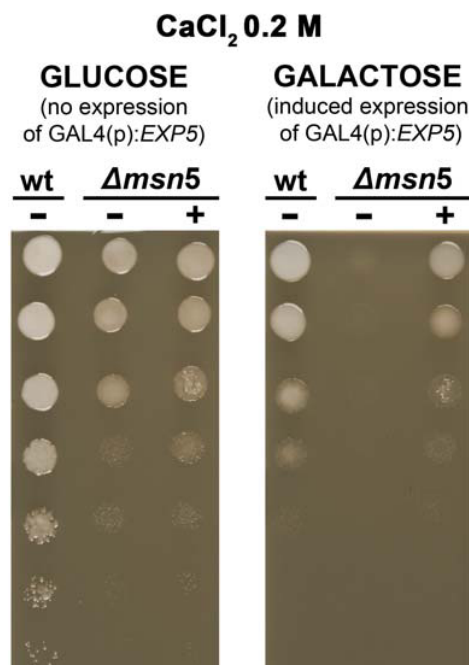

**Supplemental Figure 8. Sensitivity of the *S. cerevisiae* *Δmsn5* mutant to calcium chloride is restored by the *M. oryzae* *EXP5* gene coding sequence.** Ten  $\mu$ l of serial fivefold dilutions from exponentially growing cells in SD minus uracil were spotted on YP/glucose and YP/galactose supplemented with 0.2 M CaCl<sub>2</sub>. Plates were incubated at 30° C for 2 days. Strains labeled with a minus symbol (-) were transformed with the empty vector, while strains labeled with a plus symbol (+) were transformed with a plasmid containing the *M. oryzae* *EXP5* cDNA driven by the GAL4 promoter. Reduced growth observed in the wild type strain in the right-hand panel is due to galactose rather than glucose (the preferred substrate) being used as sole carbon source. The *Δmsn5* mutant shows higher sensitivity to CaCl<sub>2</sub> in galactose-containing medium (Alepez et al., 1999). Under non-inducing conditions (YP/glucose), both *Δmsn5* (-) and *Δmsn5* (+) show sensitivity to CaCl<sub>2</sub>. Under inducing conditions (YP/galactose), *Δmsn5* (-) fails to grow, while *Δmsn5* (+) grows similarly to the wild type strain.

## Supplemental Figure 9

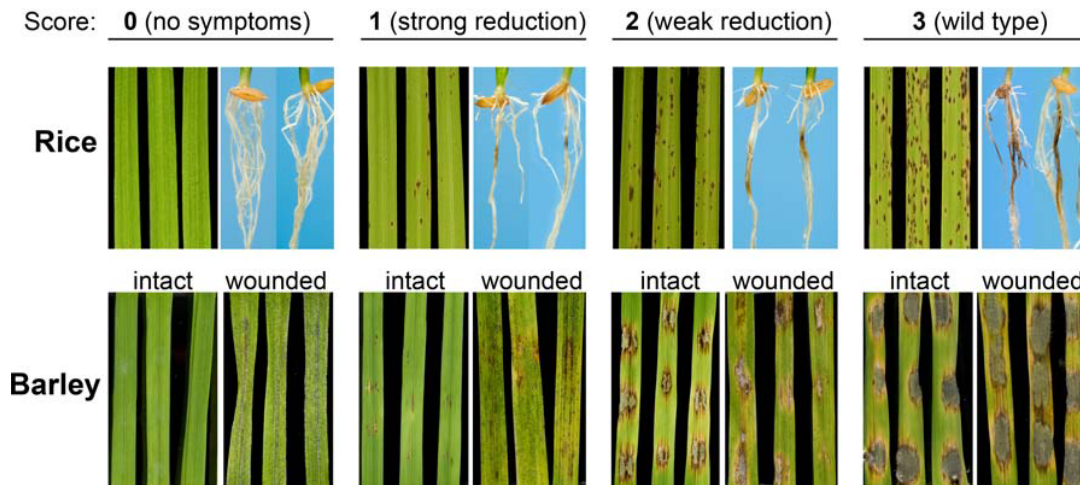

**Supplemental Figure 9. Scoring system of rice blast disease symptoms.** Visible symptoms observed 5 days after spray inoculation on whole rice plants cv. CO39 or 4 days after drop inoculation on detached leaves of barley cv. Golden Promise (intact or wounded) with *M. oryzae* conidial suspensions. Root infections were carried out with *M. oryzae* mycelial plugs and disease symptoms scored after 15 days. Lesions observed on leaves and roots were scored as 0 (non-pathogenic), 1 (strong symptom reduction), 2 (weak symptom reduction) or 3 (wild-type symptoms) based on colour intensity (for roots), lesion number (for leaves) and lesion extension (for both) of disease symptoms.

**Supplemental Table 1. Genes and mutants used in this study.**

| genes                                                                                         | mutant phenotype                                                                                                                                                                                   | invasive growth*       | expression                                                                                                                                                                                                                                                                                                                    | references                                   |
|-----------------------------------------------------------------------------------------------|----------------------------------------------------------------------------------------------------------------------------------------------------------------------------------------------------|------------------------|-------------------------------------------------------------------------------------------------------------------------------------------------------------------------------------------------------------------------------------------------------------------------------------------------------------------------------|----------------------------------------------|
| <i>PMK1</i> MGG_09565; mitogen-activated protein kinase                                       | no appressoria; non-pathogenic                                                                                                                                                                     | defective              | constitutively expressed at low levels in vegetative hyphae, conidia and germ tubes; induced expression during appressorium formation and developing conidia                                                                                                                                                                  | (Xu and Hamer, 1996; Bruno et al., 2004)     |
| <i>MST12</i> MGG_12958; transcription factor                                                  | wild type appressoria; non-pathogenic; defective in microtubule reorganization associated with penetration peg formation                                                                           | defective              | ND                                                                                                                                                                                                                                                                                                                            | (Park et al., 2002; Park et al., 2004)       |
| <i>CPKA</i> MGG_06368; catalytic subunit of cAMP-dependent protein kinase A                   | delayed, smaller and non-functional appressoria; reduced virulence; delayed glycogen and lipid mobilization required for turgor generation                                                         | wild type              | ND                                                                                                                                                                                                                                                                                                                            | (Xu et al., 1997; Thines et al., 2000)       |
| <i>PTH11</i> MGG_05871; CFEM-containing G-protein coupled receptor                            | reduced appressoria; reduced virulence; upstream effector of appressoria differentiation in response to surface cues                                                                               | wild type              | GFP-fusion protein localised in cell membrane and vacuoles during conidia germination and appressoria formation                                                                                                                                                                                                               | (DeZwaan et al., 1999)                       |
| <i>MPG1</i> MGG_10315; hydrophobin                                                            | reduced conidiation and appressoria; reduced virulence                                                                                                                                             | ND                     | expressed at early (12 h) and late (72-96 h) time points of infection. Its expression increases during nitrogen and glucose starvation; expression observed during development of aerial hyphae, conidia and appressoria                                                                                                      | (Talbot et al., 1993; Kershaw et al., 1998)  |
| <i>CBP1</i> MGG_12939; putative chitin deacetylase                                            | no appressoria on PHOB; fully pathogenic; involved in recognition of physical factors on artificial hydrophobic surfaces                                                                           | ND; probably wild type | expressed in germ tubes and repressed completely in vegetative mycelium                                                                                                                                                                                                                                                       | (Kamakura et al., 2002)                      |
| <i>AVR-Pita1</i> MGG_11081; fungal effector; metalloprotease                                  | wild type appressoria; <i>M. oryzae</i> strains expressing <i>AVR-Pita1</i> are non-pathogenic on rice cultivars carrying <i>Pi-ta</i> resistant gene                                              | ND                     | expressed in invasive hyphae at 24 to 32 hr after inoculation and later stages of growth inside the host                                                                                                                                                                                                                      | (Jia et al., 2000; Orbach et al., 2000)      |
| <i>PWL2</i> MGG_04301; fungal effector                                                        | wild type appressoria; expression of <i>PWL2</i> on <i>M. oryzae</i> rice isolates confers non-pathogenic phenotype toward weeping lovegrass without altering pathogenicity toward rice and barley | ND                     | specifically expressed during penetration, fungal colonization, and late infection (Fudal, 2007 #1284)                                                                                                                                                                                                                        | (Sweigard et al., 1995)                      |
| <i>GAS1=MAS3</i> MGG_12337; virulence factor                                                  | wild type appressoria; reduced virulence; possibly involved in penetration peg formation and/or function                                                                                           | ND                     | highly expressed during appressorium formation; expression regulated by <i>PMK1</i> ; <i>GAS1</i> is found preferentially in the vacuole of appressoria; not expressed in invasive hyphae                                                                                                                                     | (Xue et al., 2002)                           |
| <i>GAS2=MAS1</i> MGG_04202; virulence factor                                                  | wild type appressoria; reduced virulence; possibly involved in penetration peg formation and/or function                                                                                           | ND                     | highly expressed during appressorium formation; expression regulated by <i>PMK1</i> ; <i>GAS2</i> is localized in the cytoplasm; not expressed in invasive hyphae                                                                                                                                                             | (Xue et al., 2002)                           |
| <i>ACE1</i> MGG_12447; hybrid polyketide synthase/non ribosomal peptide synthetase (PKS-NRPS) | wild type appressoria; the secondary metabolite synthesised by <i>ACE1</i> confers non-pathogenic phenotype towards rice cultivars carrying <i>Pi33</i> resistant gene                             | ND                     | expressed in appressoria during fungal penetration; expression is connected to developmental programme that mediates appressorium penetration and does not require host plant signals; expression also detected in infectious hyphae and rapidly disappeared once invasive hyphae began to spread within leaf tissues (~48 h) | (Bohnert et al., 2004; Fudal et al., 2007)   |
| <i>PLS1</i> MGG_12594; tetraspanin                                                            | wild type appressoria; unable to differentiate penetration pegs; non-pathogenic                                                                                                                    | defective              | expressed at similar levels in mycelia, perithecia, spores, appressoria and infected barley leaves; GFP fusion protein localised only in plasma membranes and vacuoles within appressoria                                                                                                                                     | (Clergeot et al., 2001; Lambou et al., 2008) |

\*: determined by experiments on wounded leaves; ND: not determined

**Supplemental Table 2** . Numbers of conidial germ tubes (GT) of *M. oryzae* wild type strain Guy11 and  $\Delta pmk1/\Delta mst12$  mutants developing pre-IH on PHIL-PS and root surfaces.

| PS-PHIL        | conidial GT with pre-IH/total conidia |         |         | mean $\pm$ SD (three experiments) |               |                |
|----------------|---------------------------------------|---------|---------|-----------------------------------|---------------|----------------|
|                | 12 hrs                                | 24 hrs  | 36 hrs  | 12 hrs                            | 24 hrs        | 36 hrs         |
| Guy11          | 394/600                               | 462/600 | 552/600 | 65.7 $\pm$ 6.7                    | 77 $\pm$ 9.2  | 92 $\pm$ 2.0   |
| $\Delta mst12$ | 0/600                                 | 102/600 | 176/600 | 0.0                               | 17 $\pm$ 2.0  | 29.3 $\pm$ 2.5 |
| $\Delta pmk1$  | 0/600                                 | 4/600   | 4/600   | 0.0                               | 0.7 $\pm$ 0.6 | 0.7 $\pm$ 1.1  |

| ROOTS          | conidial GT with pre-IH/total conidia |        |        | mean $\pm$ SD (three experiments) |                |                |
|----------------|---------------------------------------|--------|--------|-----------------------------------|----------------|----------------|
|                | 12 hrs                                | 24 hrs | 36 hrs | 12 hrs                            | 24 hrs         | 36 hrs         |
| Guy11          | 51/65                                 | 66/78  | 40/43  | 78.3 $\pm$ 3.1                    | 85 $\pm$ 4.0   | 92.7 $\pm$ 1.5 |
| $\Delta mst12$ | 0/41                                  | 11/72  | 27/81  | 0.0                               | 14.7 $\pm$ 2.1 | 33.3 $\pm$ 3.5 |
| $\Delta pmk1$  | 0/46                                  | 0/43   | 0/61   | 0.0                               | 0.0            | 0.0            |

**Supplemental Table 3. The karyopherin protein family in *M. oryzae*, *S. cerevisiae* and humans.** The homology (e value) of *M. oryzae* karyopherins with their corresponding yeast and human protein orthologues is shown. \*:essential genes; blue: karyopherins involved in import; orange: karyopherins involved in export; purple: karyopherins that function in both import and export. The function of Kap120 has not yet been determined. Fourteen karyopherins are present in the *M. oryzae* genome; MGG\_02927 is the only karyopherin that is closely related to two different yeast karyopherins.

| <i>M. oryzae</i>       | Yeast                                 | Human                  |
|------------------------|---------------------------------------|------------------------|
| MGG_09208              | kap104; e-85                          | TNPO1; e-161           |
| MGG_00475              | kap122(=Pdr6); e-21                   | IPO13; e-38            |
| MGG_03668              | kap95; e-172                          | KPNB1; e-152           |
| MGG_05869              | kap123; e-106                         | IPO4; e-45             |
| MGG_03537              | kap121*(=Pse1); e 0.0                 | IPO5; e-175            |
| MGG_01449              | kap111(=Mtr10); e-95                  | TNPO3; e-57            |
| MGG_15072              | kap60(kap $\alpha$ =Srp1=Scm1); e-157 | KPNA6; e-159           |
| MGG_02927              | kap108/kap119 ; e-89/e-119            | IPO7/IPO8; e-115/e-103 |
| MGG_11165              | kap114; e-59                          | IPO9; e-61             |
| MGG_00744              | kap120; e-71                          | IPO11; e-78            |
| MGG_09560- <b>EXP5</b> | kap142(=Msn5); e-106                  | exportin-5; XPO5; e-15 |
| MGG_02526              | kap124*(=Crm1=Xpo1); e 0.0            | XPO1; e-06             |
| MGG_03994              | Cse1*(=kap $\alpha$ ); e-176          | CSE1L; e-127           |
| MGG_10127              | Los1; e-66                            | XPOT; e-87             |

**Supplemental Table 4. Primers used in this study.**

| <b>Primer name</b>                                                                      | <b>Sequence</b>                                     |
|-----------------------------------------------------------------------------------------|-----------------------------------------------------|
| <b>General primers</b>                                                                  |                                                     |
| 2SKF-KpnI                                                                               | AAAGGTACCAGGGAATAAGGGCGACACGGA                      |
| 2SKR-KpnI                                                                               | TATGGTACCTCGCCCTTCCCAACAGTTGCG                      |
| M13F                                                                                    | CGCCAGGGTTTTCCAGTCACGAC                             |
| M13R                                                                                    | AGCGGATAACAATTTACACAGGA                             |
| T3                                                                                      | AAATTAACCCTCACTAAAGGGA                              |
| AT-RB                                                                                   | GATTGTCGTTTCCCGCCTTCAG                              |
| AT-LB2                                                                                  | CCAGTACTAAAATCCAGATCCC                              |
| <b>Primers for <i>EXP5</i> gene deletion</b>                                            |                                                     |
| exp5-F1                                                                                 | CGCCTTGCTTACACCATTTCG                               |
| exp5-F2                                                                                 | GTCGTGACTGGGAAAACCCTGGCGAATAATGATGGATGACTCGG        |
| exp5-F3                                                                                 | TCCTGTGTGAAATTGTTATCCGCTATCTGGTCAGGTATCTTGTC        |
| exp5-F4                                                                                 | CTACAGTCCGAAACACCCGC                                |
| <b>Primers for <i>EXP5</i> localisation</b>                                             |                                                     |
| exp5-GW1-3F                                                                             | GGGGACAACCTTTGTATAGAAAAGTTGCTTGGTGAGCCTGCGAGTGGTG   |
| exp5-GW2F                                                                               | GGGGACAGCTTTCTTGACAAAGTGGCTATGGCAGCCCTTCCCTCTAA     |
| exp5-GW4F                                                                               | GGGGACAGCTTTCTTGACAAAGTGGCTGGCTAGGCGAAGAAGTGCG      |
| exp5-GW1R                                                                               | GGGGACTGCTTTTTTTGTACAACTTGCGGCGGCCACAAGGACTCG       |
| exp5-GW2-4R                                                                             | GGGGACAACCTTTGTATAATAAAGTTGCTAACGACAGGCATCTTGAAAGGG |
| exp5-GW3R                                                                               | GGGGACTGCTTTTTTTGTACAACTTGCTTGTCCGTCAAACAGGTTGGCAAC |
| <b>Primers for yeast complementation experiments</b>                                    |                                                     |
| EXPrY-F                                                                                 | TATGGTACCATGGCAGCCCTTCCCTCTAA                       |
| EXPrY-R                                                                                 | AAAGCGCCGCCTATTGTCCGTCAAACAGGTTGGC                  |
| <b>Primers used for Southern and Northern blot hybridisation with <i>EXP5</i> probe</b> |                                                     |
| exp5-S2                                                                                 | GCTACAACAAGAACTCAATGG                               |
| exp5-P1                                                                                 | TAGTGTTAGCAAATCGGAGC                                |
| <b>Promoter-GFP fusion construct primers</b>                                            |                                                     |
| Nco-5'                                                                                  | GCTGTTCTCCAGCCGGTCGCGGAGGC <u>G</u> ATG             |
| Nco-3'                                                                                  | CAT <u>C</u> GCCTCCGCGACCGGCTGGAGAACAGC             |
| CT74-6                                                                                  | CTTCGGAACCGACTCGATCCTC                              |
| 5Pr-Gas1                                                                                | GTCCTATCGATGGACGAATGCTCCAGAAACCAGC                  |
| 3Pr-Gas1                                                                                | GTCCTCCATGGTTGAAAGAGAAGTGGGGGTGGGT                  |
| 5Pr-Gas2                                                                                | GTCCTATCGATGATGATGGCACCTTGGGATGGAGG                 |
| 3Pr-Gas2                                                                                | GCTACCATGGTTGGCGGTTTCAAATTTGTTTTCT                  |
| 5Pr-PWL2                                                                                | GTCCTATCGATGGTTACAAACGACCGACAGCTCC                  |
| 3Pr-PWL2                                                                                | GTCCTCCATGGTTGAAAGTTTTTAATTTTAAAAAGAGATT            |
| 5Pr- AVR-Pita                                                                           | GTCCTATCGATTTGTAAATTTCAAAGTCAGGGA                   |
| 3Pr- AVR-Pita                                                                           | GCTTCCATGGATTGCAAAAATAATGTTAATTGTGC                 |
